# Supplementary material
Source: PubMed Central journal article supplement (PMC4793997)
Supplement: mccd022293.ww2_default.pdf [file mccd022293.ww2_default.pdf]

**Appendix 2: Supplementary tables** [posted as supplied by author]

Table A: Sensitivity Analyses of Hospital Admission Rates for Ambulatory Care Sensitive Conditions (Composite Measure) After Massachusetts' Health Care Reform Among Adults 18-64 (2004-2010)

| Model                                                                         | Difference in Change, Massachusetts vs. Control Group | 95% CI or p-value |
|-------------------------------------------------------------------------------|-------------------------------------------------------|-------------------|
| Baseline Model                                                                | 1.2%                                                  | -1.6% , 4.1%      |
| Model with Standard Errors Calculated using bootstrap method (fixed effects)  | 1.2%                                                  | -1.6%, 4.0%       |
| Model with Standard Errors Calculated using bootstrap method (random effects) | 1.2%                                                  | -0.1%, 2.5%       |
| Model Using Negative Binomial Regression                                      | 1.7%                                                  | -0.3%, 3.7%       |
| Model Including Longer Post-reform Time Period                                | 4.7%                                                  | 1.5%, 7.9%        |
| Linear Probability Model                                                      | 0.45                                                  | -0.02, 0.9        |
| Model Using Propensity Score Matched Controls                                 | 0.0%                                                  | -3.1%, 3.2%       |
| Model with interrupted time series specification                              |                                                       |                   |
| Level estimate                                                                | 0.18                                                  | p=0.68            |
| Trend estimate                                                                | -0.01                                                 | p=0.92            |

Table B: Sensitivity Analyses of Racial and Ethnic Disparities in Hospital Admission Rates for Ambulatory Care Sensitive Conditions (Composite Measure) After Massachusetts' Health Care Reform Among Adults 18-64 (2004-2010)

| Model                                                                         | Difference in Change, Massachusetts vs. Control Group | 95% CI or p-value |
|-------------------------------------------------------------------------------|-------------------------------------------------------|-------------------|
| Baseline Model                                                                |                                                       |                   |
| Black-White Disparity                                                         | -1.9%                                                 | -8.5%, 5.11%      |
| Hispanic-White Disparity                                                      | 2.0%                                                  | -7.5%, 14.4%      |
| Model with Standard Errors Calculated using bootstrap method (fixed effects)  |                                                       |                   |
| Black-White Disparity                                                         | -1.9%                                                 | -9.5%, 6.2%       |
| Hispanic-White Disparity                                                      | 2.0%                                                  | -8.3%, 13.4%      |
| Model with Standard Errors Calculated using bootstrap method (random effects) |                                                       |                   |
| Black-White Disparity                                                         | -1.9                                                  | -5.7%, 2.0%       |
| Hispanic-White Disparity                                                      | 2.0                                                   | -2.5%, 6.6%       |
| Model Using Negative Binomial Regression                                      |                                                       |                   |
| Black-White Disparity                                                         | -1.9%                                                 | -7.5%, 4.0%       |
| Hispanic-White Disparity                                                      | 3.3%                                                  | -3.3%, 10.3%      |
| Model Including Longer Post-reform Time Period                                |                                                       |                   |
| Black-White Disparity                                                         | -2.7%                                                 | -10.7%, 6.1%      |
| Hispanic-White Disparity                                                      | 5.7%                                                  | -3.8%, 16.1%      |
| Linear Probability Model                                                      |                                                       |                   |
| Black-White Disparity                                                         | -1.2                                                  | -3.1, 0.7         |
| Hispanic-White Disparity                                                      | -0.6                                                  | -2.3, 1.2         |
| Model Using Propensity Score Matched Controls                                 |                                                       |                   |
| Black-White Disparity                                                         | -5.7%                                                 | -13.0%, 2.2%      |
| Hispanic-White Disparity                                                      | 0.01%                                                 | -10.9%, 12.4%     |
| Model with interrupted time series specification                              |                                                       |                   |
| Level estimate                                                                |                                                       |                   |
| Black-White Disparity                                                         | 0.22                                                  | p=0.32            |
| Hispanic-White Disparity                                                      | -2.3                                                  | p=0.11            |
| Trend estimate                                                                |                                                       |                   |
| Black-White Disparity                                                         | 0.01                                                  | p=0.96            |
| Hispanic-White Disparity                                                      | -0.03                                                 | p=0.86            |

Table C. Pre-reform Trend Analysis of Hospital Admission Rates for Ambulatory Care Sensitive Conditions After Massachusetts' Health Care Reform Among Adults 18-64 (2004-2010) Using an Interrupted Time-series Approach

| Measure                                          | Estimated Regression Coefficient from Interrupted Time Series Analysis Examining Pre-reform Trends (slope) in ACSC Admission Rates in MA and Control States | p-value |
|--------------------------------------------------|-------------------------------------------------------------------------------------------------------------------------------------------------------------|---------|
| Overall composite ACSC                           | 0.018                                                                                                                                                       | 0.77    |
| Acute composite ACSC                             | 0.039                                                                                                                                                       | 0.09    |
| Chronic ACSC                                     | -0.02                                                                                                                                                       | 0.68    |
| Overall Composite ACSC Black-white difference    | 0.021                                                                                                                                                       | 0.32    |
| Overall Composite ACSC Hispanic-white difference | 0.26                                                                                                                                                        | 0.23    |
